# Supplementary material for: A label-free electrochemical DNA biosensor used a printed circuit board gold electrode (PCBGE) to detect SARS-CoV-2 without amplification
Source: Royal Society of Chemistry journal article supplement (doi:10.1039/d2lc01159j), 2023-01-01
Supplement: d2lc01159j1.pdf [file d2lc01159j1.pdf]

## Supporting information

### **A label-free electrochemical DNA biosensor used a printed circuit board gold electrode (PCBGE) to detect SARS-CoV-2 without amplification**

Nor Syafirah Zambry <sup>a</sup>, Mohd Syafiq Awang <sup>b</sup>, Khi Khim Beh <sup>b</sup>, Hairul Hisham Hamzah <sup>c,\*</sup>, Yazmin Bustami <sup>d</sup>, Godwin Attah Obande <sup>e,f</sup>, Muhammad Fazli Khalid <sup>a</sup>, Mehmet Ozsoz <sup>a,g</sup>, Asrulnizam Abd Manaf <sup>b,\*</sup> and Ismail Aziah <sup>a,\*</sup>

<sup>a</sup> Institute for Research in Molecular Medicine (INFORMM), Health Campus, Universiti Sains Malaysia, 16150 Kubang Kerian, Kelantan, Malaysia.

<sup>b</sup> Collaborative Microelectronic Design Excellence Center (CEDEC), Universiti Sains Malaysia, Sains@USM, Level 1, Block C, No.10 Persiaran Bukit Jambul, 11900 Bayan Lepas, Pulau Pinang, Malaysia.

<sup>c</sup> School of Chemical Sciences, Universiti Sains Malaysia, 11800 Minden, Pulau Pinang, Malaysia.

<sup>d</sup> School of Biological Sciences, Universiti Sains Malaysia, 11800 Minden, Pulau Pinang, Malaysia.

<sup>e</sup> Department of Medical Microbiology and Parasitology, Universiti Sains Malaysia, 16150 Kubang Kerian, Kelantan, Malaysia.

<sup>f</sup> Department of Microbiology, Faculty of Science, Federal University of Lafia, Lafia, Nasarawa state, Nigeria.

<sup>g</sup> Department of Biomedical Engineering, Faculty of Engineering, Near East University, 99138 Nicosia, Turkey

\*Corresponding authors' e-mail addresses: [hishamhamzah@usm.my](mailto:hishamhamzah@usm.my), [eeasrulnizam@usm.my](mailto:eeasrulnizam@usm.my); [aziahismail@usm.my](mailto:aziahismail@usm.my)

### Printed circuit board gold electrode (PCBGE)

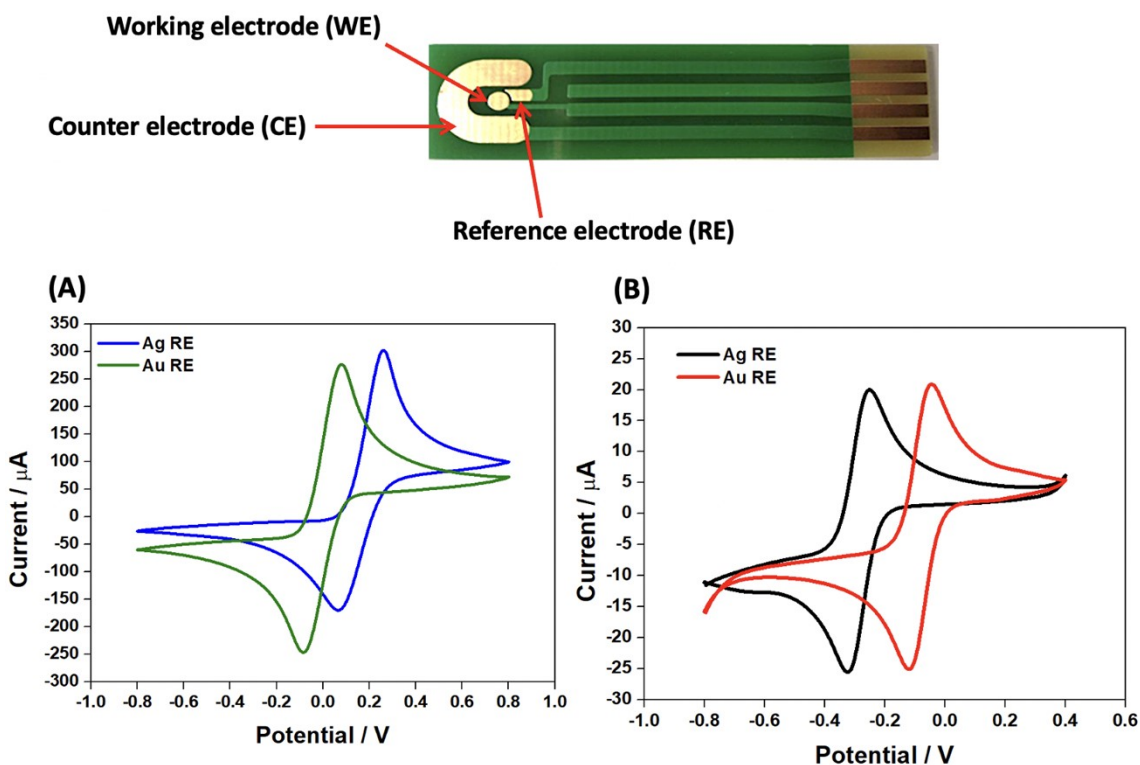

**Figure S1.** Cyclic voltammograms (third cycle shown) of PCBGEs in (A) 50 mM K<sub>4</sub>Fe(CN)<sub>6</sub> solution and (B) 1 mM RuHex solution at a scan rate of 0.1 V s<sup>-1</sup> were obtained using two different reference electrodes (REs) coated with silver (Ag) and gold (Au), respectively.

Table S1. The calculated  $i_{pa}/i_{pc}$  value for two different PCBGEs with silver (Ag) and gold (Au) coated reference electrodes, respectively in a 50 mM K<sub>4</sub>Fe(CN)<sub>6</sub> solution (Figure S1A).

| Reference electrode (RE) | $i_{pa}/i_{pc}$ | $E_{peak}$ / mV | $E_{mid}$ / mV |
|--------------------------|-----------------|-----------------|----------------|
| Gold (Au)                | $1.06 \pm 0.02$ | $186 \pm 22$    | $-4 \pm 0.4$   |
| Silver (Ag)              | $1.26 \pm 0.06$ | $212 \pm 12$    | $153 \pm 9$    |

Table S2. The calculated  $i_{pa}/i_{pc}$  value for two different PCBGEs with silver (Ag) and gold (Au) coated reference electrodes, respectively, in a 1 mM RuHex solution (Figure S1B).

| Reference electrode (RE) | $i_{pa}/i_{pc}$ | $E_{peak}$ / mV | $E_{mid}$ / mV |
|--------------------------|-----------------|-----------------|----------------|
| Gold (Au)                | $1.20 \pm 0.02$ | $-71.6 \pm 3.7$ | $-105 \pm 8$   |
| Silver (Ag)              | $1.30 \pm 0.02$ | $-72.4 \pm 1.4$ | $-299 \pm 11$  |

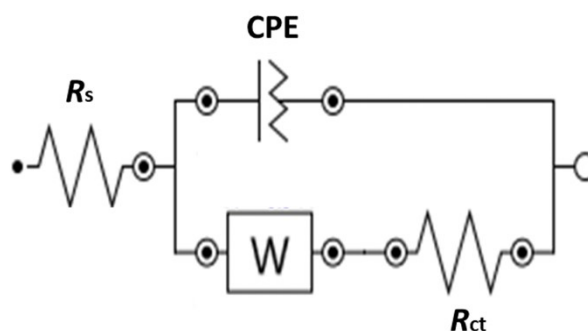

**Figure S2.** Suggested an equivalent circuit model utilized in convergently fitting the Nyquist plots from EIS measurements.  $R_s$  is the solution resistance,  $W$  is the Warburg constant, CPE is the constant phase element, and  $R_{ct}$  is the charge transfer resistance.

**Table S3.**  $R_{ct}$  values, fitting errors, convergence fit values, and convergence for the fitted Nyquist plots are shown in Figure 3B, based on an equivalent model circuit proposed in Figure S2.

| Electrode              | $R_{ct} / \text{k}\Omega$ | Fitting error / % | Convergence fit ( $x^2$ ) | Convergence |
|------------------------|---------------------------|-------------------|---------------------------|-------------|
| Bare Au                | 0.15                      | 2.24              | 0.075                     | Yes         |
| Au-Thiolated ssDNA     | 0.58                      | 1.02              | 0.053                     | Yes         |
| MCH/Au-Thiolated ssDNA | 1.03                      | 0.91              | 0.043                     | Yes         |

**Table S4.**  $R_{ct}$  values, fitting errors, convergence fit values, and convergence for the fitted Nyquist plots are shown in Figure 4B, based on an equivalent model circuit proposed in Figure S2.

| Electrode           | $R_{ct} / \text{k}\Omega$ | Fitting error / % | Convergence fit ( $x^2$ ) | Convergence |
|---------------------|---------------------------|-------------------|---------------------------|-------------|
| DNA sensor          | 1.03                      | 0.91              | 0.0426                    | Yes         |
| DNA sensor + Target | 3.06                      | 3.84              | 0.2419                    | Yes         |
| DNA (1 $\mu$ M)     |                           |                   |                           |             |

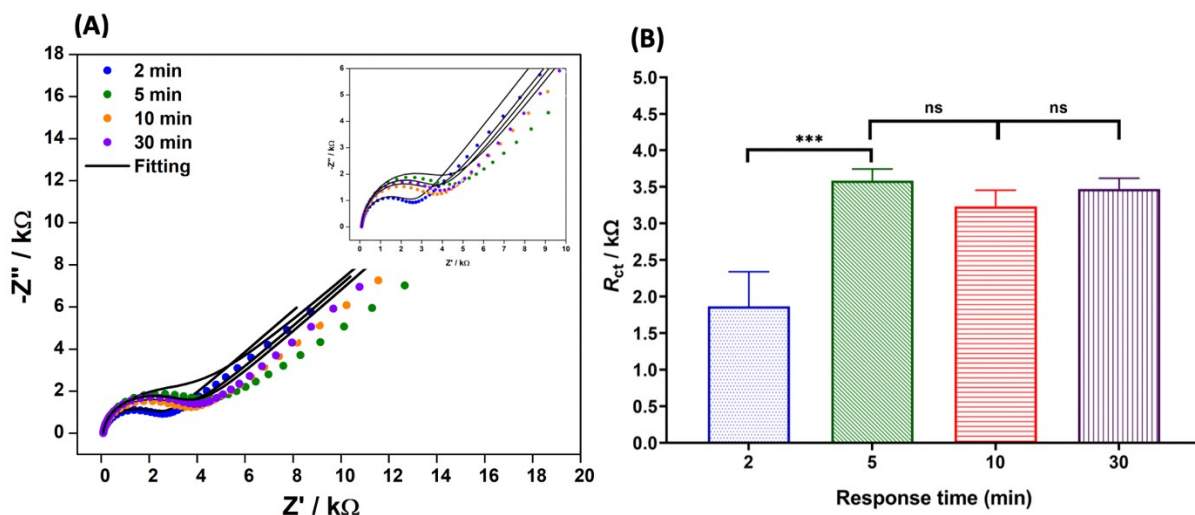

**Figure S3.** (A) Nyquist plots (fitting errors are shown in Table S5) and (B) charge-transfer resistance ( $R_{ct}$ ) values for DNA sensor-based PCBGE at different incubation times of target ssDNA (from 2 to 30 min). Statistical analyses were performed using the Tukey test. Data points are the mean values obtained in 3 independent experiments  $\pm$  SD, and \*\*\* denotes  $p$  (0.001) and (ns) not significant.

**Table S5.**  $R_{ct}$  values, fitting errors, convergence fit values, and convergence for the fitted Nyquist plots are shown in Figure S3, based on an equivalent model circuit proposed in Figure S2.

| Incubation time (min) | $R_{ct} / k\Omega$ | Fitting error / % | Convergence fit ( $\chi^2$ ) | Convergence |
|-----------------------|--------------------|-------------------|------------------------------|-------------|
| 2                     | 2.22               | 2.83              | 0.133                        | Yes         |
| 5                     | 3.76               | 4.52              | 0.304                        | Yes         |
| 10                    | 3.06               | 3.84              | 0.242                        | Yes         |
| 30                    | 3.31               | 2.44              | 0.105                        | Yes         |

**Table S6.**  $R_{ct}$  values, fitting errors, convergence fit values, and convergence for the fitted Nyquist plots are shown in Figure 6A, based on an equivalent model circuit proposed in Figure S2.

| <b>Electrode</b>                          | <b><math>R_{ct}</math> / <math>k\Omega</math></b> | <b>Fitting error / %</b> | <b>Convergence fit (<math>x^2</math>)</b> | <b>Convergence</b> |
|-------------------------------------------|---------------------------------------------------|--------------------------|-------------------------------------------|--------------------|
| DNA sensor                                | 1.03                                              | 0.91                     | 0.0426                                    | Yes                |
| DNA sensor +<br>Target DNA<br>(1 $\mu$ M) | 3.76                                              | 4.52                     | 0.3041                                    | Yes                |
| DNA sensor +<br>1-Base<br>Mismatch        | 1.11                                              | 0.91                     | 0.0430                                    | Yes                |

**Table S7.**  $R_{ct}$  values, fitting errors, convergence fit values, and convergence for the fitted Nyquist plots are shown in Figure 7A, based on an equivalent model circuit proposed in Figure S2.

| <b>Electrode</b> | <b><math>R_{ct}</math> / <math>k\Omega</math></b> | <b>Fitting error / %</b> | <b>Convergence fit (<math>x^2</math>)</b> | <b>Convergence</b> |
|------------------|---------------------------------------------------|--------------------------|-------------------------------------------|--------------------|
| DNA sensor       | 1.03                                              | 0.91                     | 0.0426                                    | Yes                |
| 1 $\mu$ M        | 3.76                                              | 4.52                     | 0.3041                                    | Yes                |
| 3 $\mu$ M        | 4.49                                              | 1.35                     | 0.0230                                    | Yes                |
| 5 $\mu$ M        | 6.61                                              | 1.74                     | 0.0044                                    | Yes                |
| 8 $\mu$ M        | 10.85                                             | 2.13                     | 0.0582                                    | Yes                |
| 15 $\mu$ M       | 27.53                                             | 1.29                     | 0.0322                                    | Yes                |

**Table S8.**  $R_{ct}$  values, fitting errors, convergence fit values, and convergence for the fitted Nyquist plots are shown in Figure 7C, based on an equivalent model circuit proposed in Figure S2.

| <b>Electrode</b>       | <b><math>R_{ct}</math> / <math>k\Omega</math></b> | <b>Fitting error / %</b> | <b>Convergence fit (<math>x^2</math>)</b> | <b>Convergence</b> |
|------------------------|---------------------------------------------------|--------------------------|-------------------------------------------|--------------------|
| DNA sensor             | 1.03                                              | 0.91                     | 0.0426                                    | Yes                |
| 1 copy/ $\mu$ L        | 40.06                                             | 2.17                     | 0.1262                                    | Yes                |
| 10 copies/ $\mu$ L     | 70.19                                             | 3.58                     | 0.2078                                    | Yes                |
| 1000 copies/ $\mu$ L   | 82.56                                             | 2.91                     | 0.1173                                    | Yes                |
| 100000 copies/ $\mu$ L | 166.25                                            | 2.83                     | 0.1115                                    | Yes                |

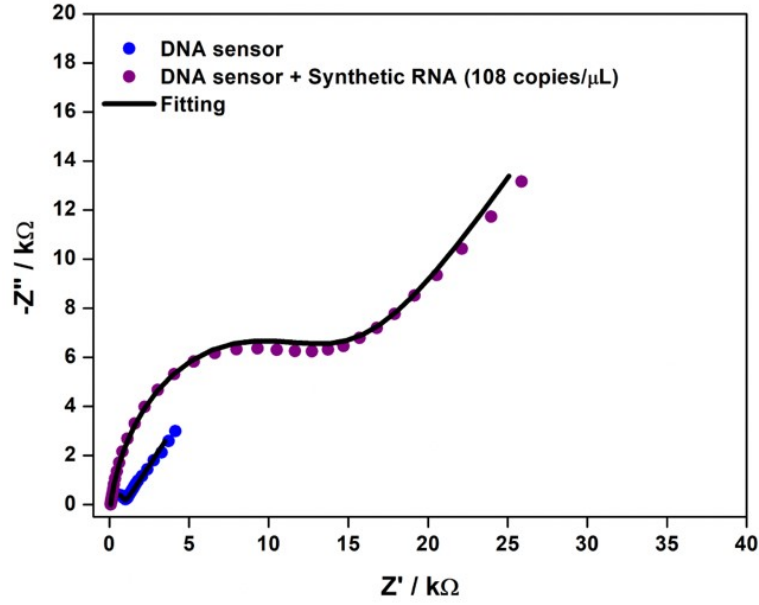

**Figure S4.** (A) Nyquist plots (fitting errors are shown in Table S9) for detection of synthetic RNA.

**Table S9.**  $R_{ct}$  values, fitting errors, convergence fit values, and convergence for the fitted Nyquist plots are shown in Figure S4, based on an equivalent model circuit proposed in Figure S2.

| Electrode                                        | $R_{ct} / k\Omega$ | Fitting error / % | Convergence fit ( $\chi^2$ ) | Convergence |
|--------------------------------------------------|--------------------|-------------------|------------------------------|-------------|
| DNA sensor                                       | 0.879              | 1.356             | 0.064312                     | Yes         |
| DNA sensor + Synthetic RNA (108 copies/ $\mu$ L) | 13.59              | 1.60              | 0.0366                       | Yes         |

**Table S10.**  $R_{ct}$  values, fitting errors, convergence fit values, and convergence for the fitted Nyquist plots are shown in Figure 8A, based on an equivalent model circuit proposed in Figure S2.

| <b>Electrode</b>                  | <b><math>R_{ct}</math> / <math>k\Omega</math></b> | <b>Fitting error / %</b> | <b>Convergence fit (<math>\chi^2</math>)</b> | <b>Convergence</b> |
|-----------------------------------|---------------------------------------------------|--------------------------|----------------------------------------------|--------------------|
| DNA sensor                        | 0.879                                             | 1.356                    | 0.064312                                     | Yes                |
| DNA sensor +<br>Negative sample A | 1.8989                                            | 0.59                     | 0.023294                                     | Yes                |
| DNA sensor +<br>Negative sample B | 1.8546                                            | 0.419                    | 0.010508                                     | Yes                |
| DNA sensor +<br>Negative sample C | 1.702                                             | 0.614                    | 0.02576                                      | Yes                |
| DNA sensor +<br>Positive sample A | 4.1693                                            | 0.744                    | 0.037141                                     | Yes                |
| DNA sensor +<br>Positive sample B | 4.0779                                            | 0.549                    | 0.02026                                      | Yes                |
| DNA sensor +<br>Positive sample C | 4.9554                                            | 0.699                    | 0.032741                                     | Yes                |
